# Supplementary material
Source: PubMed Central journal article supplement (PMC3964104)
Supplement: 1321524111_sapp.pdf [file 1321524111_sapp.pdf]

**Supporting Information for:**

**Mapping posttranscriptional regulation of the human glycome uncovers microRNA  
defining the glycode.**

Praveen Agrawal<sup>1‡</sup>, Tomasz Kurcon<sup>1‡</sup>, Kanoelani T. Pilobello<sup>2‡</sup>, John F. Rakus<sup>1‡</sup>, Sujeethraj  
Koppolu<sup>1</sup>, Bianca Batista<sup>2</sup>, William S. Eng<sup>1</sup>, Ku-Lung Hsu<sup>3</sup>, Yaxuan Liang<sup>1</sup>, and Lara K.  
Mahal<sup>1,2,3\*</sup>

**Includes:**

**Supplementary Figures 1-9**  
**Supplementary Tables 1-3**  
**Supplementary Methods and Sequences.**

## Supplementary Figures

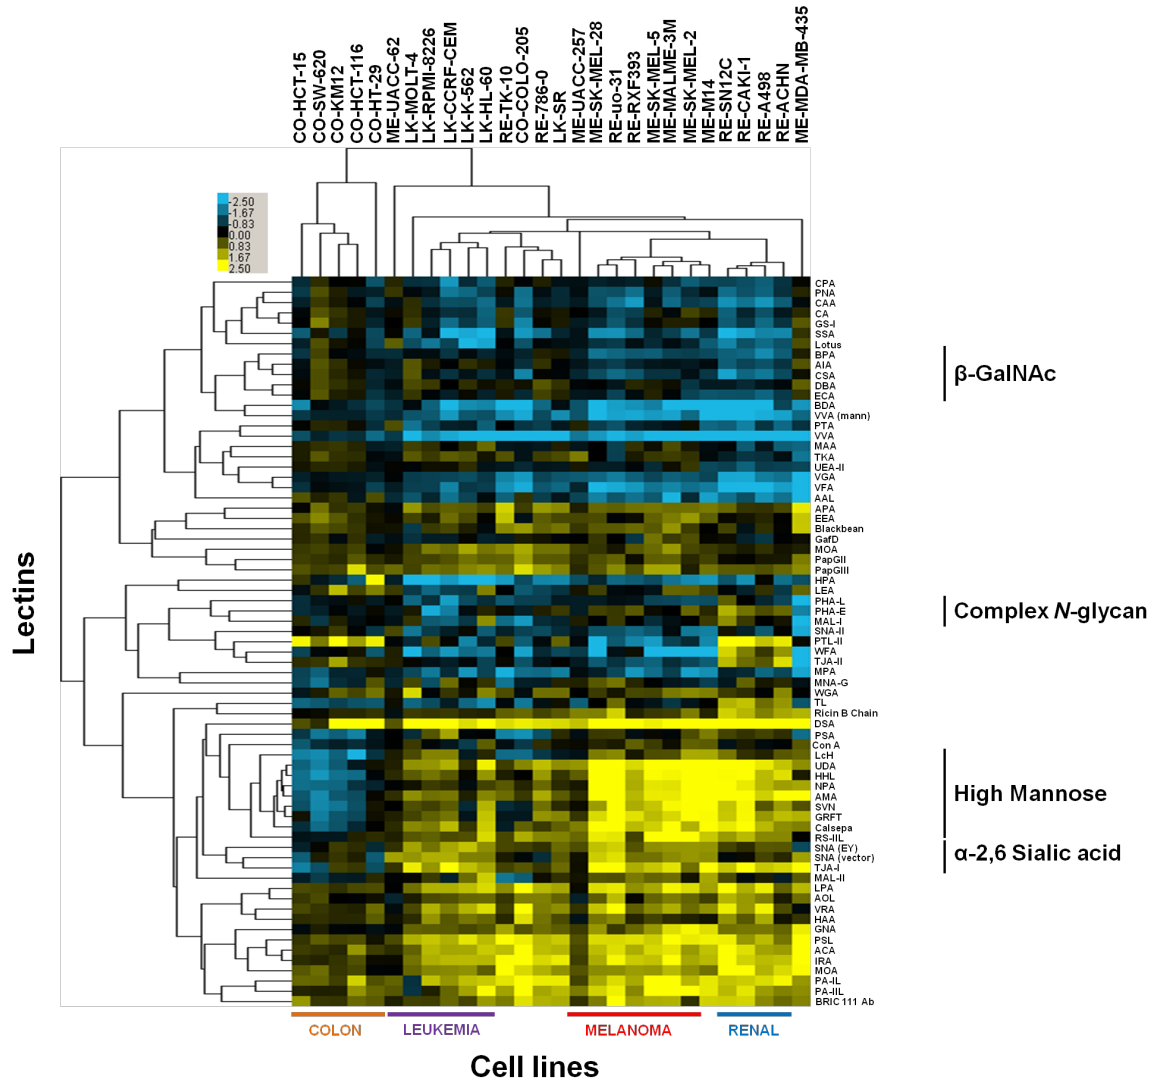

**Figure S1. Ratiometric comparison of 28 NCI-60 cell lines from 4 tissue types.** Equal amounts (1.5  $\mu$ g by protein) of Cy5-labeled samples and Cy3-labeled reference were analyzed on the lectin microarray. Median-normalized  $\log_2$  ratios (S/R) were hierarchically clustered using centered Pearson correlation coefficient as the distance metric and average linkage analysis ( $n=71$  lectins). Heat map is shown. Yellow =  $\log_2(S/R) > \log_2(S_{\text{median}}/R_{\text{median}})$ , Blue =  $\log_2(S_{\text{median}}/R_{\text{median}}) > \log_2(S/R)$ .

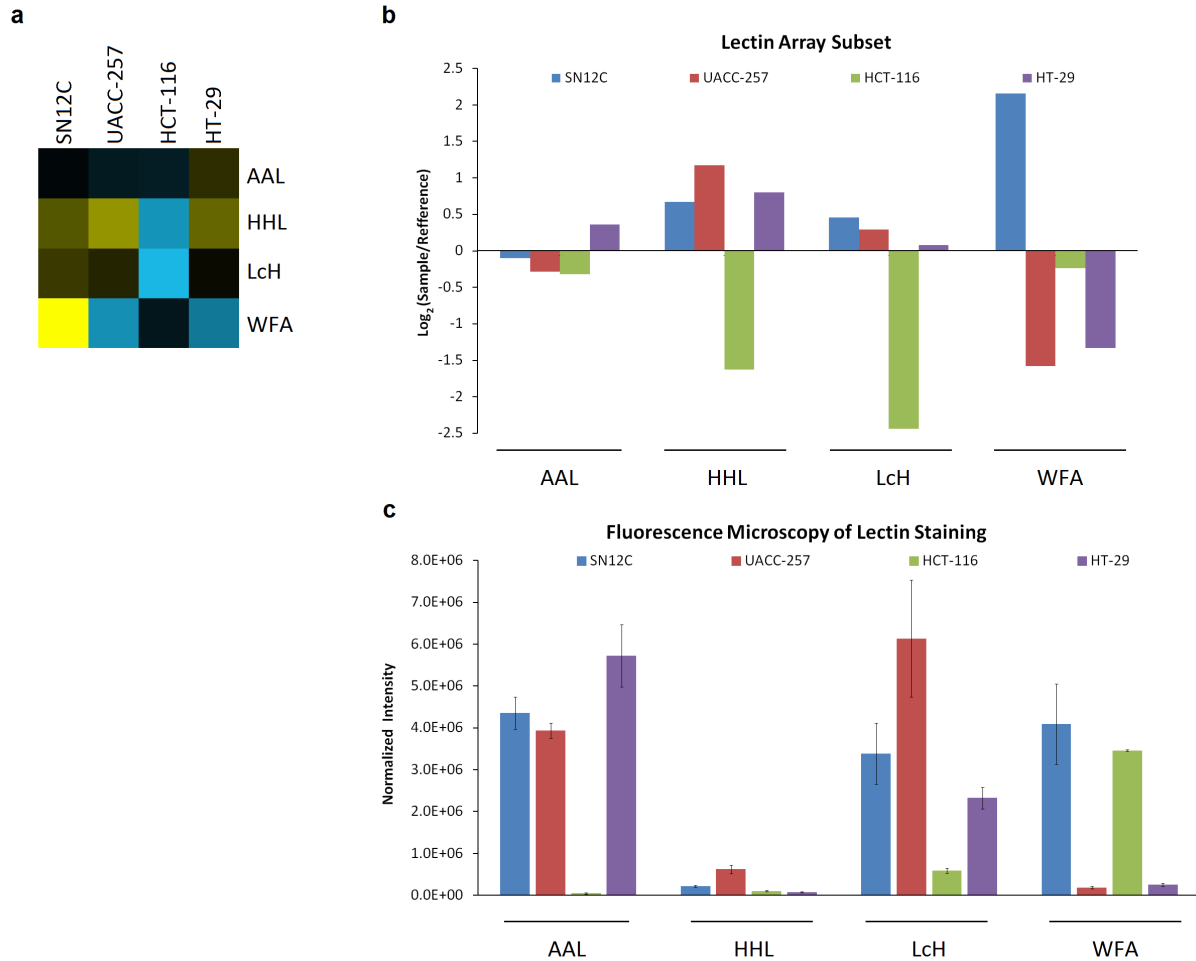

**Figure S2 Validation of lectin microarray data via fluorescence microscopy.** (a) Subset of lectin microarray data from four cell lines used for validation. Data is from the expanded NCI-60 dataset shown in Figure 1. (b) Graphical representation of  $\log_2$  intensity values represented in (a). (c) SN12C (renal), UACC-257 (melanoma), HCT-116 (colon), HT-29 (colon) cells were grown to ~80% confluency, fixed with 4% paraformaldehyde and stained with biotinylated lectins (AAL, HHL, LcH, WFA, 10  $\mu\text{g/ml}$  in PBS) followed by Cy5-streptavidin (1:100, Invitrogen). Fluorescence intensity was visualized by fluorescence microscopy. Graph represents the average fluorescence for 6 areas per image chosen in brightfield and normalized to cell count (>29 cells/image, brightfield) for 4 random images for each cell line/lectin combination (n=24). Standard deviation is shown.

a

High Mannose Clusters

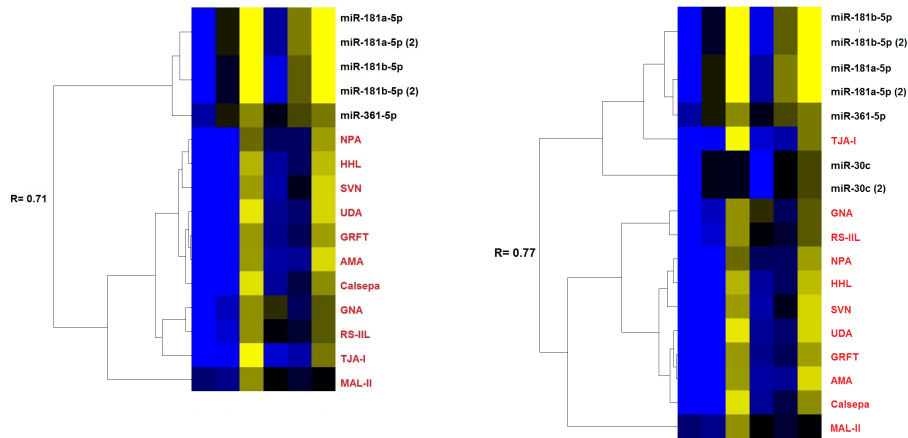

Pearson correlation: **Uncentered**

**Centered**

b

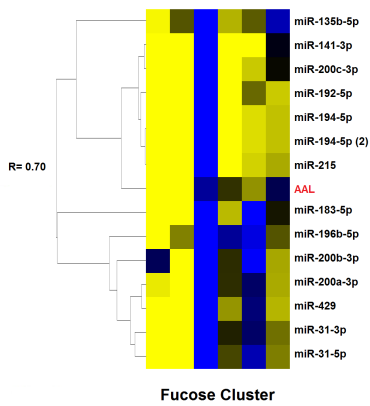

**Fucose Cluster**

c

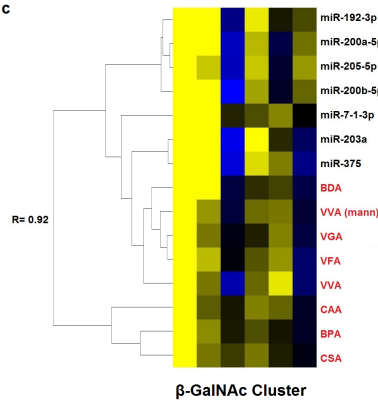

**β-GalNAc Cluster**

d

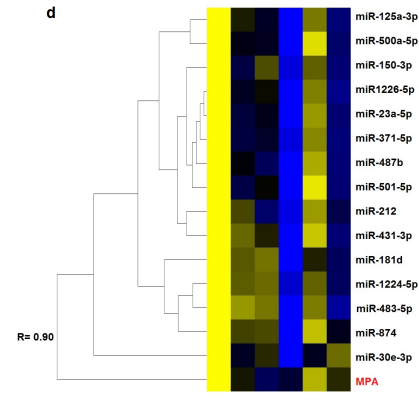

**Tn/T-Antigen Cluster**

e

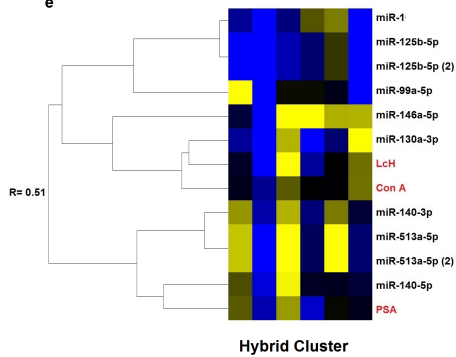

**Hybrid Cluster**

f

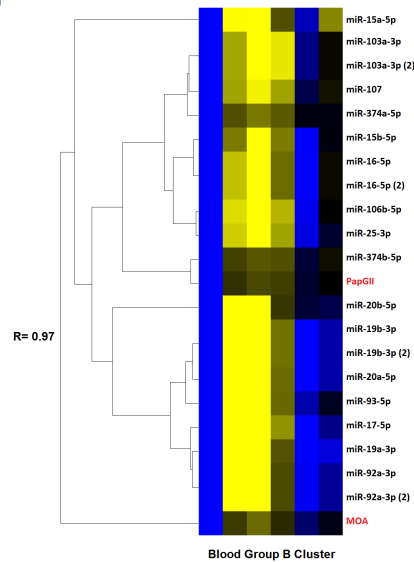

**Blood Group B Cluster**



**Figure S3. MiRNA/Lectin Clusters.** (a) High mannose clusters: Uncentered Pearson Cluster (as in Fig. 2c,  $R=0.71$ , one-tailed  $P=0.06$ ) and Centered Pearson cluster containing miRNA-30c ( $R=0.77$ , one-tailed  $P<0.05$ ). (b) Fucose cluster ( $R=0.70$ , one-tail  $P=0.060$ ). (c)  $\beta$ -GalNAc cluster ( $R=0.92$ , one-tailed  $P<0.05$ ). (d) Tn/T-Antigen cluster ( $R=0.90$ , one-tailed  $P<0.05$ ). (e) Hybrid cluster ( $R= 0.51$ , one-tailed  $P=0.15$ ). (f) Blood group B cluster ( $R= 0.97$ , one-tailed  $P<0.05$ ).  $P$ -values were calculated using the Pearson correlation coefficient  $R$  and  $n=6$ . Lectins are indicated in red.

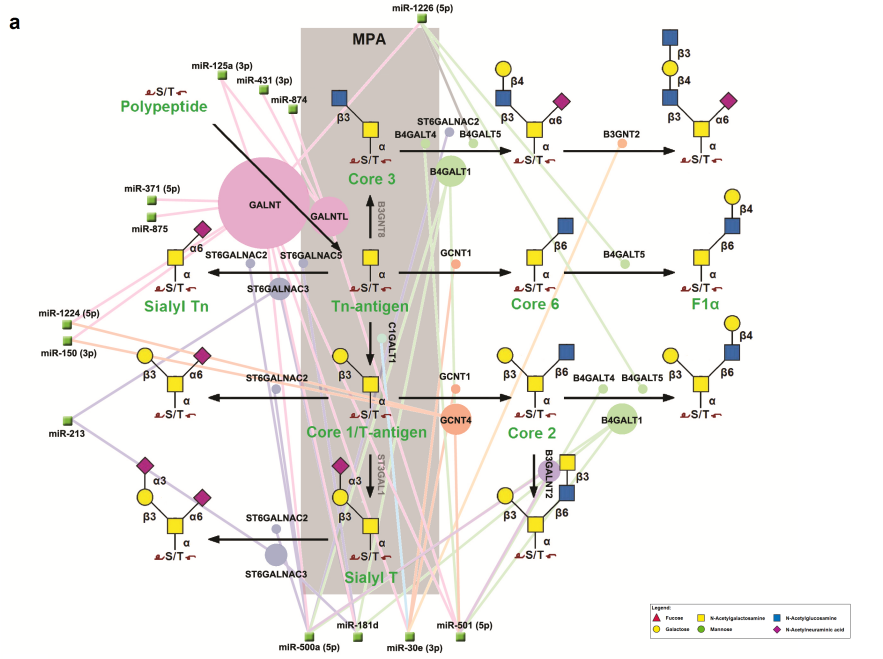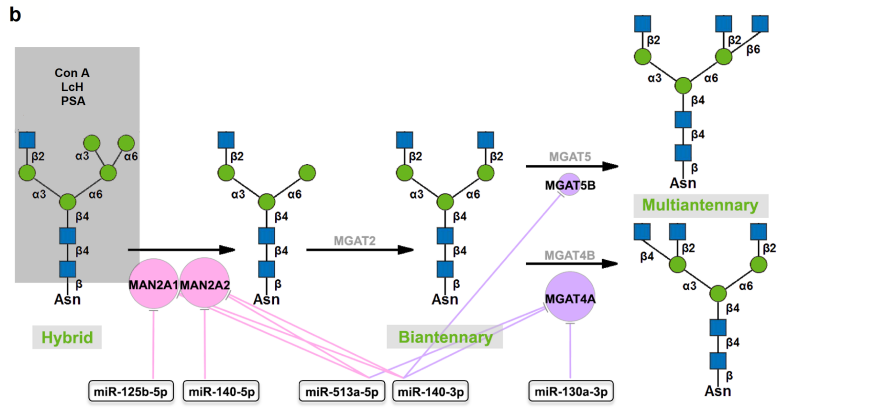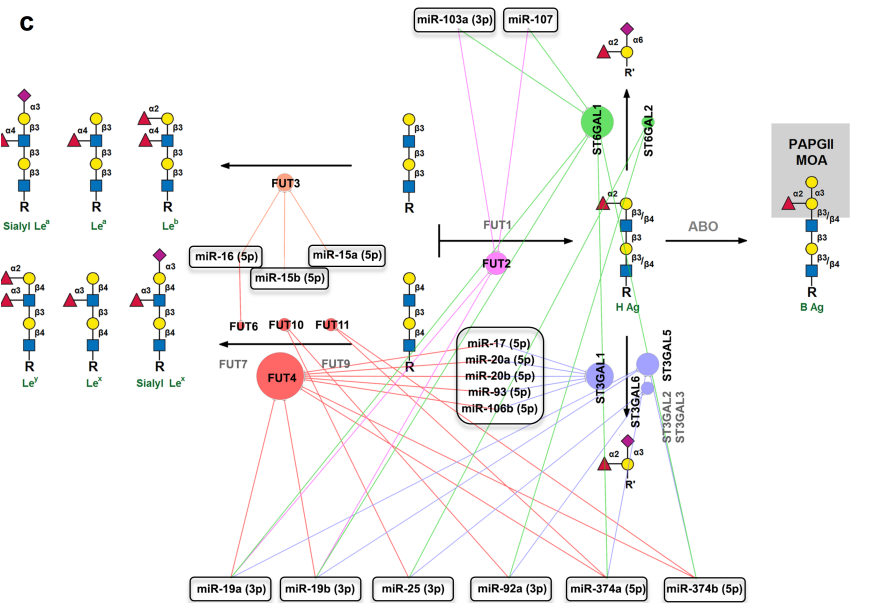

**Figure S4. Detailed representation of additional glycan biosynthetic networks derived from lectin/miRNA clusters.** (a) Tn/T network, (b) hybrid network, (c) blood group B network. Grey boxes: epitopes recognized by lectins. Bubbles: predicted miRNA targets, the bubble size reflects number of miRNA targeting gene. Lines: connect miRNA with targets, Genes in silver: genes in the pathway that are not targeted. (a) Tn-/T-antigen network contains multiple miRNAs predicted to target enzymes involved in branching at the 6-position of GalNAc. Modification at this position abrogates binding of MPA. Due to the large number of predicted targets from GALT and GALNTL family members each family are represented by one bubble. (b) Hybrid network is composed of lectins with overlapping specificity for hybrid and biantennary *N*-linked glycan structures (Con A, PSA and LcH).  $\alpha$ -mannosidase II family members (*MAN2A1*, *MAN2A2*) are common relevant predicted target of the miRNAs in the cluster and a regulatory switch between hybrid and complex *N*-glycans. (c) Blood group network consists of multiple miRNAs targeting enzymes diverging substrate pools away from formation of the blood group B epitope recognized by PapGII (37) and MOA, lectins from this cluster.

**a**

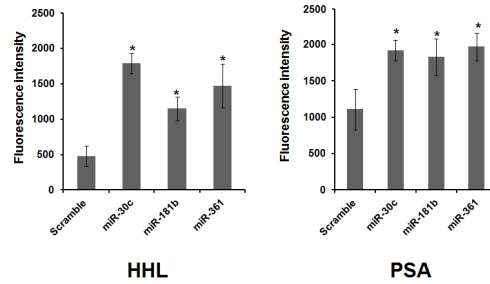

**b**

| Treated        | GNA              |           | HHL              |           | NPA              |           | PSA              |           | LcH Control      |           |
|----------------|------------------|-----------|------------------|-----------|------------------|-----------|------------------|-----------|------------------|-----------|
|                | Avg. Int. (a.u.) | StDev (±) | Avg. Int. (a.u.) | StDev (±) | Avg. Int. (a.u.) | StDev (±) | Avg. Int. (a.u.) | StDev (±) | Avg. Int. (a.u.) | StDev (±) |
| Scramble mimic | 473              | 133       | 475              | 145       | 850              | 121       | 1109             | 281       | 1147             | 418       |
| miR-30c-5p     | 969              | 200       | 1793             | 147       | 2120             | 343       | 1919             | 142       | 1312             | 513       |
| miR-181b-5p    | 820              | 123       | 1152             | 169       | 1507             | 211       | 1827             | 252       | 1068             | 400       |
| miR-361-5p     | 1383             | 200       | 1472             | 312       | 1601             | 198       | 1968             | 193       | 1278             | 432       |

**c**

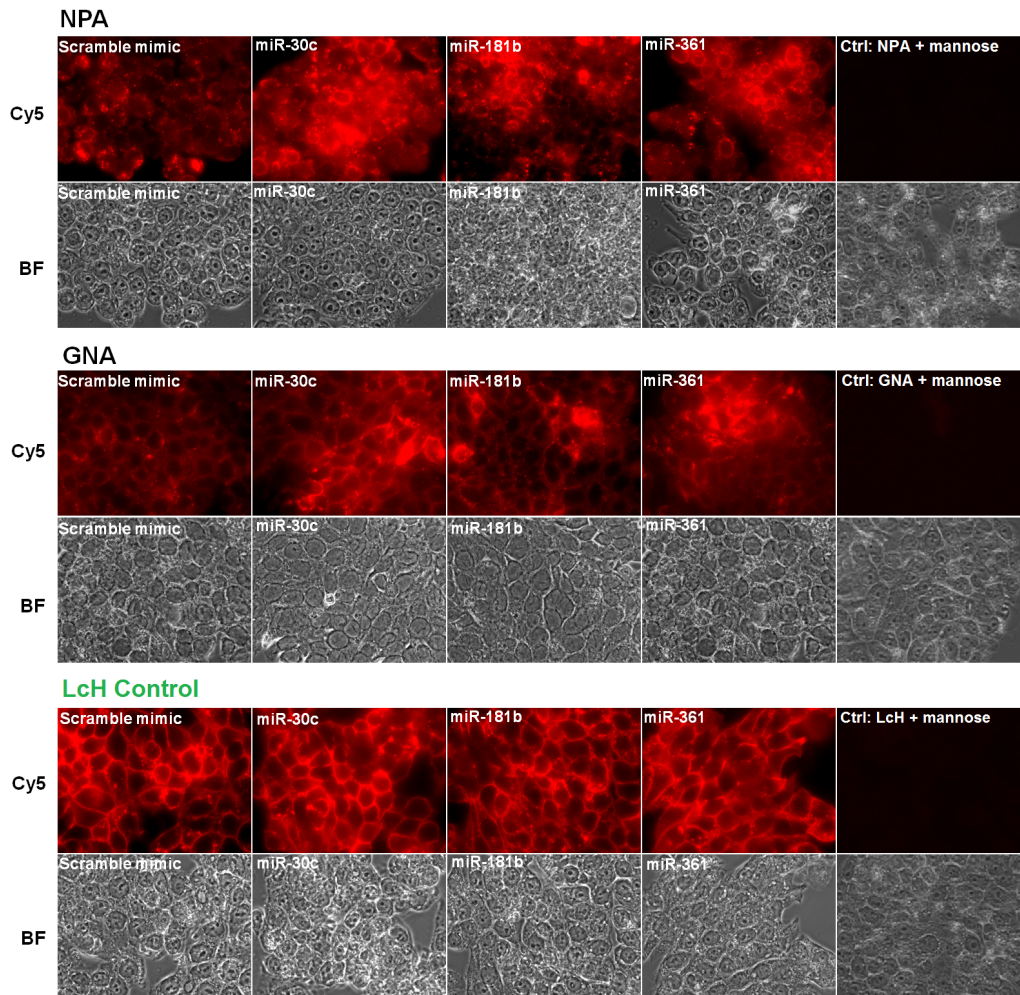

**Figure S5. MiR-30c, -181b-5p and -361-5p increase cell surface high mannose.** HT-29 cells were treated with miR-30c, -181b-5p (miR-181b), -361-5p (miR-361) mimics or a control (scramble mimic, 50 nM) for 96 hour, fixed and labeled with biotinylated lectins/ Cy5-streptavidin and visualized by fluorescence microscopy. (a) Quantitation of staining with HHL and PSA. (b) Summary table of lectin

staining following treatment (scramble in bold blue). For both (*a and b*) data from 10 images per replicate (3 biological replicates, 30 images total, 180 random areas) were averaged to generate graphs. Areas with clear fluorescent aggregates were excluded from our analysis. Error bars represent standard deviations. *P*-values were calculated using the two-tailed unpaired Student's *t*-test with equal variances for comparison to scramble control, \**P* < 0.05. LcH is a specificity control for PSA staining of high mannose. LcH and PSA both bind core fucosylated *N*-linked glycans but PSA has much higher affinity for high mannose epitopes (Tateno, H., Nakamura-Tsuruta, S., and Hirabayashi, J., *Glycobiology* **2009**, *19*. 527–536) and thus is more sensitive to changes in high mannose levels as observed herein. (*c*) Representative fluorescence and brightfield images for staining with NPA, GNA and LcH are shown. For all lectins, in preincubation with monosaccharide inhibited binding.

HT-29

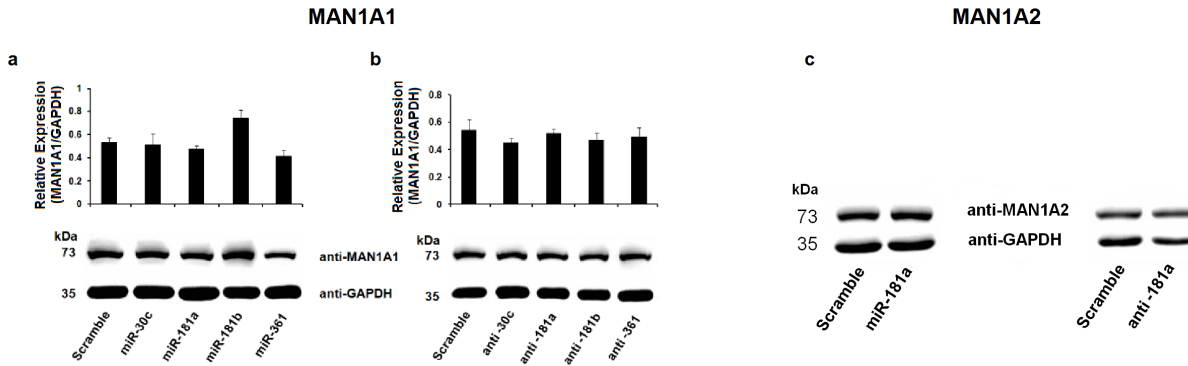

SN12C

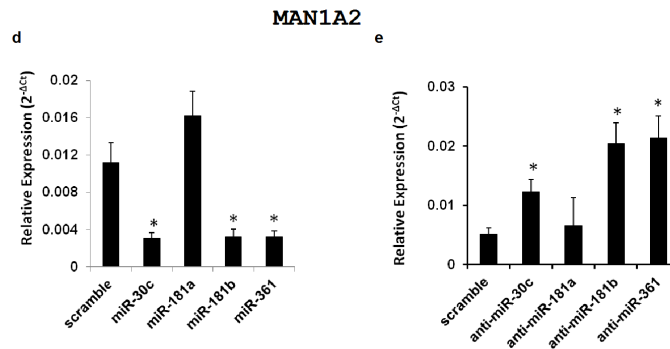

**Figure S6. Analysis of *MAN1A1* and *MAN1A2* expression in cells transfected with miR-30c, -181a, -181b and miR-361 or scramble.** (a-b) *MAN1A1* protein expression as assessed by Western blot analysis in HT-29 following 72 h treatment with miRNA mimics (a) or inhibitors (b). Graphs show average signal normalized to GAPDH of three biological replicates. Representative images corresponding to the graphs are shown. (c) *MAN1A2* protein expression following 72 h treatment with miR-181a mimics or inhibitors as assessed by Western blot analysis. No statistical difference in *MAN1A2* expression was observed upon treatment. Image shown is representative of 3 independent experiments. (d-e) RT-PCR analysis of *MAN1A2* expression in SN12C following 72 h treatment with miR-30c, -181a, -181b and miR-361 or scramble mimics (d) or corresponding inhibitors (e). Graphs show average relative expression normalized to *GAPDH* of three biological replicates. For all graphs, error bars denote standard deviation and P-values <0.05 using the Student's t-test comparison with scramble control are denoted by \*.

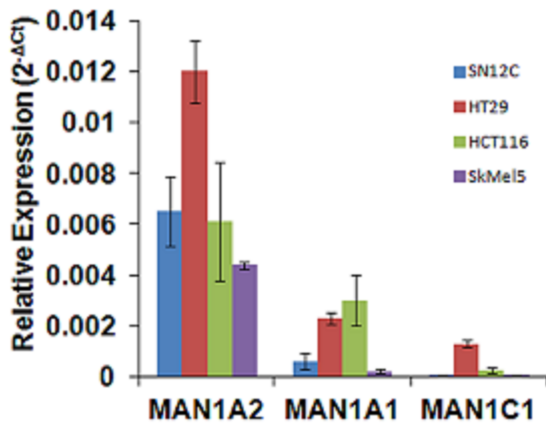

**Figure S7.** RT-qPCR analysis of the endogenous levels of *MAN1A2*, *MAN1A1* and *MAN1C1* in NCI-60 cell lines HT-29 and HCT116, SN12C and SkMel-5. Graphs show relative expression normalized to *GAPDH*. Error bars denote standard deviation.

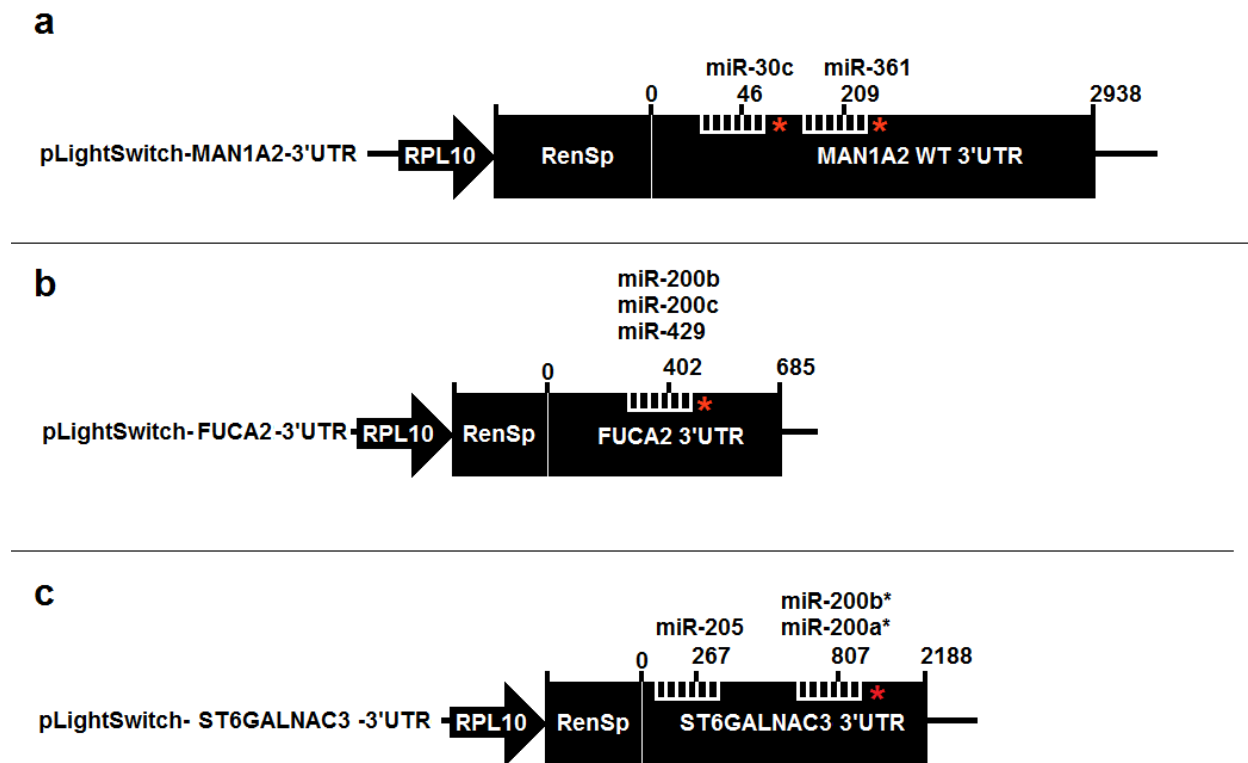

**Figure S8. Schematic representations of luciferase constructs.** (a) *MAN1A2*, (b) *FUCA2*, (c) *ST6GALNAC3*. Mutated miRNA binding sites are indicated with a red asterisk. See Supporting Information Table S3 for details on constructs.

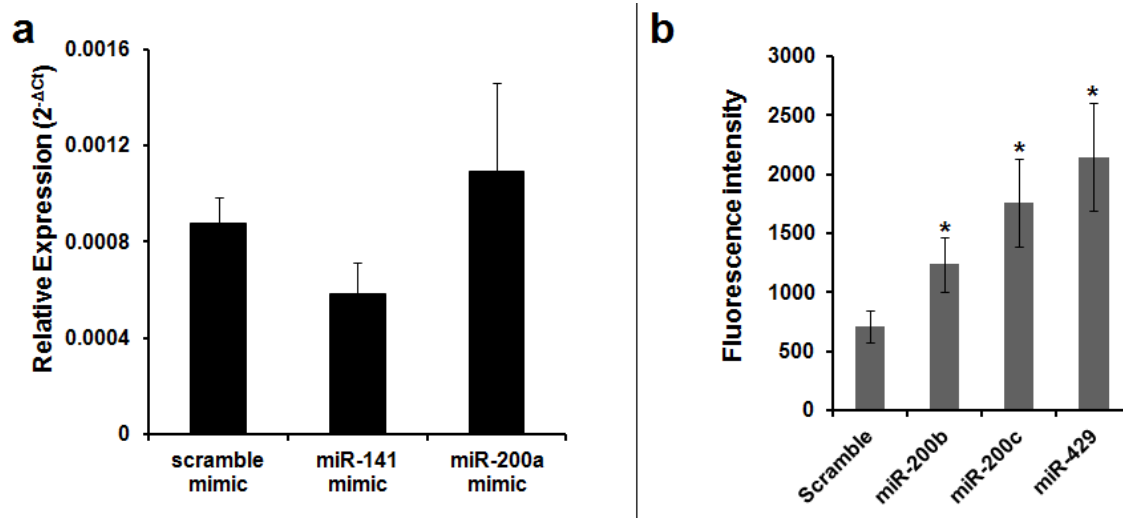

**Figure S9. Effects of miR-200f on *FUCA2* and fucose expression.** (a) Effects of miR-200a and miR-141 on *FUCA2* gene expression in HT-29. HT-29 cells were treated with miRNA or scramble mimics (50 nM) for 72 h. *FUCA2* mRNA levels were analyzed in RT-qPCR as previously described. Graphs show average relative expression normalized to *GAPDH* of three biological replicates. Error bars denote standard deviation. No significant difference was observed in *FUCA2* mRNA levels for miR-200a or -141 treated samples compared to scramble using the Student's *t*-test. (b) Quantitative analysis of AAL staining of HT-29 treated with miR-200b, -200c, -429 or scramble for 96 hours. Graph shows average data from 6 random regions/image, 10 images per replicate, 3 biological replicates (30 images total, 180 random areas). Error bars represent standard deviations. *P*-values were calculated using the two-tailed unpaired Student's *t*-test with equal variances for comparison to scramble control, \**P* < 0.05.

## Supplementary Tables

**Table S1. Lectin print conditions (Original dataset).** Abbreviations: Gal: Galactose, Fuc: Fucose, Man: Mannose, Lac: Lactose, GalNAc: *N*-acetylgalactosamine, GlcNAc: *N*-acetylglucosamine.

| Lectin source                  | Lectin abbreviation | Print concentration (μg/ml) | Print monosaccharide |
|--------------------------------|---------------------|-----------------------------|----------------------|
| <i>Abrus precatorius</i>       | APA                 | 500                         | Gal                  |
| <i>Anguilla anguilla</i>       | AAA                 | 1000                        | Fuc                  |
| <i>Arachis hyogaea</i>         | PNA                 | 500                         | Gal                  |
| <i>Artocarpus integrifolia</i> | AIA                 | 500                         | Gal                  |
| <i>Bauhinia purpurea</i>       | BPA                 | 500                         | Gal                  |
| <i>Bryonia dioica</i>          | BDA                 | 500                         | Gal                  |
| <i>Canavalia ensiformis</i>    | Con A               | 500                         | Man                  |
| <i>Cancer antennarius</i>      | CCA                 | 500                         | Lac                  |
| <i>Caragana arborescens</i>    | CAA                 | 500                         | Gal                  |



|                                    |             |      |        |
|------------------------------------|-------------|------|--------|
| <i>Cicer arietinum</i>             | CPA         | 1000 | Lac    |
| <i>Colchicum autumnale</i>         | CA          | 500  | Gal    |
| <i>Cystisus scoparius</i>          | CSA         | 500  | Gal    |
| <i>Datura stramonium</i>           | DSA         | 500  | Lac    |
| <i>Dolichos biflorus</i>           | DBA         | 500  | Gal    |
| <i>Erythrina cristagalli</i>       | ECA         | 500  | Gal    |
| <i>Eunonymus europaeus</i>         | EEA         | 500  | Lac    |
| <i>Galanthus nivalis</i>           | GNA         | 1000 | Man    |
| <i>Griffonia simplicifolia</i>     | GS-I        | 500  | Gal    |
| <i>Griffonia simplicifolia</i>     | GS-II       | 500  | GlcNAc |
| <i>Salvia sclarea</i>              | SSA         | 2000 | Lac    |
| <i>Helix pomatia</i>               | HPA         | 500  | Gal    |
| <i>Lens culinaris</i>              | LcH         | 500  | Man    |
| <i>Limax flavus</i>                | LFA         | 500  | Lac    |
| <i>Lotus tetragonolobus</i>        | Lotus (LTL) | 500  | Fuc    |
| <i>Lycopersicon esculentum</i>     | LEA         | 500  | GlcNAc |
| <i>Limulus polphemus</i>           | LPA         | 500  | Lac    |
| <i>Maackia amurensis</i>           | MAA         | 500  | Lac    |
| <i>Narcissus pseudonarcissus</i>   | NPA         | 1000 | Man    |
| <i>Persea americana</i>            | PAA         | 500  | GlcNAc |
| <i>Phaseolus lunatus</i>           | LBA         | 1000 | Gal    |
| <i>Phaseolus vulgaris</i>          |             |      |        |
| Erythroagglutinin                  | PHA-E       | 500  | Lac    |
| <i>Phaseolus vulgaris</i>          |             |      |        |
| Leucoagglutinin                    | PHA-L       | 500  | Gal    |
| <i>Pisum sativum</i>               | PSA         | 500  | Man    |
| <i>Aspergillus oryzae</i>          | AOL         | 500  | Fuc    |
| <i>Psophocarpus tetragonolobus</i> | PTA         | 500  | Gal    |
| <i>Robinia pseudoacacia</i>        | RPA         | 500  | GlcNAc |
| <i>Sambucus nigra</i>              | SNA         | 500  | Gal    |
| <i>Sambucus nigra</i>              | SNA-II      | 500  | Gal    |
| <i>Sambucus nigra</i>              | SNA         | 500  | Gal    |
| <i>Solanus tuberosum</i>           | STA         | 500  | GlcNAc |
| <i>Sophora japonica</i>            | SJA         | 500  | Gal    |
| <i>Trichosanthes kirilowii</i>     | TKA         | 500  | Gal    |
| <i>Triticum vulgare</i>            | WGA         | 500  | GlcNAc |
| <i>Tulipa sp.</i>                  | TL          | 1000 | GlcNAc |
| <i>Ulex europaeus I</i>            | UEA-I       | 500  | Fuc    |
| <i>Ulex europaeus II</i>           | UEA-II      | 1000 | GlcNAc |
| <i>Urtica dioica</i>               | UDA         | 1000 | GlcNAc |

|                                           |               |      |        |
|-------------------------------------------|---------------|------|--------|
| <i>Vicia graminea</i>                     | VGA           | 500  | Gal    |
| <i>Vicia villosa</i>                      | VVA           | 500  | Gal    |
| <i>Vicia villosa</i>                      | VVA (mann)    | 500  | Man    |
| <i>Vigna radiata</i>                      | VRA           | 500  | Gal    |
| <i>Vicia faba</i>                         | VFA           | 500  | Gal    |
| <i>Wisteria floribunda</i>                | WFA           | 500  | Gal    |
| Black bean                                | Blackbean     | 1000 | Lac    |
| Ricin B chain                             | Ricin B Chain | 1000 | Lac    |
| <i>Hippeastrum Hybrid</i>                 | HHL           | 500  | Man    |
| <i>Maackia amurensis-I</i>                | MAL- I        | 1000 | Lac    |
| <i>Maackia amurensis-II</i>               | MAL-II        | 500  | Lac    |
| <i>Psophocarpus tetragonolobus</i>        | PTL-I         | 1000 | Gal    |
| <i>Psophocarpus tetragonolobus</i>        | PTL-II        | 1000 | Gal    |
| Cyanovirin                                | CVN           | 1000 | Man    |
| Scytovirin                                | SVN           | 500  | Man    |
| Griffithsin                               | GRFT          | 500  | Man    |
| Cholera Toxin from <i>Vibrio cholerae</i> | Cholera Toxin | 2000 | Lac    |
| <i>Amaranthus Caudatus</i>                | ACA           | 500  | Lac    |
| <i>Marasmius oreades</i>                  | MOA           | 500  | Gal    |
| <i>Maclura pomifera</i>                   | MPA           | 500  | Gal    |
| <i>Polyporus squamosus</i>                | PSL           | 500  | Gal    |
| <i>Trichosanthes japonica</i>             | TJA-I         | 1000 | Lac    |
| <i>Trichosanthes japonica</i>             | TJA-II        | 500  | Lac    |
| <i>Aleuria aurantia</i>                   | AAL           | 500  | Fuc    |
| antibody                                  | 7-LE Ab       | 500  | Lac    |
| antibody                                  | 2-25 Ab       | 500  | Lac    |
| <i>Allium moly</i>                        | AMA           | 1000 | Man    |
| <i>Calystegia Sepium</i>                  | Calsepa       | 500  | Man    |
| <i>Homarus Americanus</i>                 | HAA           | 1000 | Gal    |
| <i>Marasmius oreades</i>                  | MOA           | 500  | Gal    |
| <i>Iris Hybrid</i>                        | IRA           | 1000 | Gal    |
| <i>Morniga sp.</i>                        | MNA-G         | 1000 | Gal    |
| Bacteria                                  | GafD          | 500  | GlcNAc |
| Bacteria                                  | PA-IL         | 500  | Gal    |
| Bacteria                                  | PA-IIL        | 500  | Fuc    |
| Bacteria                                  | RS-IIL        | 500  | Man    |
| Galectin-1                                | Galectin-1    | 500  | Lac    |
| antibody                                  | BRIC 111 Ab   | 500  | Lac    |

**Table S2. Lectin microarray print conditions (Expanded NCI-60 dataset).** Abbreviations: Gal: Galactose, Fuc: Fucose, Man: Mannose, Lac: Lactose, GalNAc: *N*-acetylgalactosamine, GlcNAc: *N*-acetylglucosamine.

| <b>Lectin source</b>               | <b>Lectin abbreviation</b> | <b>Print concentration (µg/ml)</b> | <b>Print monosaccharide</b> |
|------------------------------------|----------------------------|------------------------------------|-----------------------------|
| <i>Abrus precatorius</i>           | APA                        | 500                                | Gal                         |
| <i>Anguilla anguilla</i>           | AAA                        | 1000                               | Fuc                         |
| <i>Bryonia dioica</i>              | BDA                        | 500                                | Gal                         |
| <i>Canavalia ensiformis</i>        | Con A                      | 500                                | Man                         |
| <i>Cancer antennarius</i>          | CCA                        | 500                                | Lac                         |
| <i>Caragana arborescens</i>        | CAA                        | 500                                | Gal                         |
| <i>Cicer arietinum</i>             | CPA                        | 1000                               | Lac                         |
| <i>Colchicum autumnale</i>         | CA                         | 500                                | Gal                         |
| <i>Cystisus scoparius</i>          | CSA                        | 500                                | Gal                         |
| <i>Datura stramonium</i>           | DSA                        | 500                                | Lac                         |
| <i>Dolichos biflorus</i>           | DBA                        | 500                                | Gal                         |
| <i>Eunonymus europaeus</i>         | EEL                        | 500                                | Lac                         |
| <i>Galanthus nivalis</i>           | GNA                        | 1000                               | Man                         |
| <i>Helix pomatia</i>               | HPA                        | 500                                | Gal                         |
| <i>Salvia sclarea</i>              | SSA                        | 2000                               | Lac                         |
| <i>Limax flavus</i>                | LFA                        | 500                                | Lac                         |
| <i>Limulus polyphemus</i>          | LPA                        | 500                                | Lac                         |
| <i>Maackia amurensis</i>           | MAA                        | 500                                | Lac                         |
| <i>Narcissus pseudonarcissus</i>   | NPA                        | 1000                               | Man                         |
| <i>Persea americana</i>            | PAA                        | 500                                | GlcNAc                      |
| <i>Phaseolus lunatus</i>           | LBA                        | 1000                               | Gal                         |
| <i>Psophocarpus tetragonolobus</i> | PTA                        | 500                                | Gal                         |
| <i>Sambucus nigra</i>              | SNA                        | 500                                | Gal                         |
| <i>Sambucus nigra</i>              | SNA-II                     | 500                                | Gal                         |
| <i>Trichosanthes kirilowii</i>     | TKA                        | 500                                | Gal                         |
| <i>Tulipa sp.</i>                  | TL                         | 1000                               | GlcNAc                      |
| <i>Ulex europaeus II</i>           | UEA-II                     | 1000                               | GlcNAc                      |
| <i>Urtica dioica</i>               | UDA                        | 1000                               | GlcNAc                      |
| <i>Vicia graminea</i>              | VGA                        | 500                                | Gal                         |
| <i>Vicia villosa</i>               | VVA (mann)                 | 500                                | Gal                         |
| <i>Vigna radiata</i>               | VRA                        | 500                                | Gal                         |
| <i>Vicia faba</i>                  | VFA                        | 500                                | Gal                         |
| <i>Black bean</i>                  | Blackbean                  | 1000                               | Lac                         |
| <i>Ricin B chain</i>               | RCA                        | 1000                               | Lac                         |

|                                             |               |      |        |
|---------------------------------------------|---------------|------|--------|
| <i>Maackia amurensis-I</i>                  | MAL- I        | 1000 | Lac    |
| <i>Maackia amurensis-II</i>                 | MAL-II        | 500  | Lac    |
| <i>Psophocarpus tetragonolobus</i>          | PTL-I         | 1000 | Gal    |
| <i>Psophocarpus tetragonolobus</i>          | PTL-II        | 1000 | Gal    |
| <i>Cyanovirin</i>                           | CVN           | 1000 | Man    |
| <i>Scytovirin</i>                           | SVN           | 500  | Man    |
| <i>Robinia pseudoacacia</i>                 | RPA           | 500  | GlcNAc |
| <i>Cholera Toxin from Vibrio cholerae</i>   | Cholera Toxin | 2000 | Lac    |
| <i>Amaranthus Caudatus</i>                  | ACL           | 500  | Lac    |
| <i>Allium sativum</i>                       | ASA           | 1000 | Man    |
| <i>Marasmiium oreades</i>                   | MOA           | 500  | Gal    |
| <i>Maclura pomifera</i>                     | MPA           | 500  | Gal    |
| <i>Trichosanthes japonica</i>               | TJA-I         | 1000 | Lac    |
| <i>Trichosanthes japonica</i>               | TJA-II        | 500  | Lac    |
| <i>Allium moly</i>                          | AMA           | 1000 | Man    |
| <i>Calystegia Sepium</i>                    | Calsepa       | 500  | Man    |
| <i>Homarus Americanus</i>                   | HAA           | 1000 | Gal    |
| <i>Iris Hybrid</i>                          | IRA           | 1000 | Gal    |
| <i>Morniga sp.</i>                          | MNA-G         | 1000 | Gal    |
| <i>Aleuria aurantia</i>                     | AAL           | 500  | Fuc    |
| <i>Amaranthus Caudatus</i>                  | ACL           | 500  | Lac    |
| <i>Bauhinia purpurea</i>                    | BPA           | 500  | Gal    |
| <i>Dolichus biflorus</i>                    | DBA           | 500  | Gal    |
| <i>Erythrina cristagalli</i>                | ECA           | 500  | Gal    |
| <i>Griffonia simplicifolia</i>              | GS-I          | 500  | Gal    |
| <i>Griffonia simplicifolia</i>              | GS-II         | 500  | GlcNAc |
| <i>Hippeastrum hybrid</i>                   | HHL           | 500  | Man    |
| <i>Artocarpus integrifolia</i>              | AIA           | 500  | Gal    |
| <i>Lens culinaris</i>                       | LCA           | 500  | Man    |
| <i>Lycopersicon esculentum</i>              | LEA           | 500  | GlcNAc |
| <i>Lotus tetragonolobus</i>                 | Lotus (LTL)   | 500  | Fuc    |
| <i>Phaseolus vulgaris erythroagglutinin</i> | PHA-E         | 500  | Lac    |
| <i>Phaseolus vulgaris leucoagglutinin</i>   | PHA-L         | 500  | Gal    |
| <i>Pisum sativum</i>                        | PSL           | 500  | Man    |
| <i>Arachis hyogaea</i>                      | PNA           | 500  | Gal    |
| <i>Glycine max</i>                          | SBA           | 500  | Gal    |
| <i>Sophora japonica</i>                     | SJA           | 500  | Gal    |
| <i>Solanus tuberosum</i>                    | STA           | 500  | GlcNAc |
| <i>Ulex europaeus I</i>                     | UEA-I         | 500  | Fuc    |
| <i>Vicia villosa</i>                        | VVA           | 500  | Gal    |
| <i>Wisteria floribunda</i>                  | WFA           | 500  | Gal    |

|                              |         |        |        |
|------------------------------|---------|--------|--------|
| <i>Triticum vulgare</i>      | WGA     | 500    | GlcNAc |
| <i>Euonymus europaeus</i>    | EEL     | 500    | Lac    |
| <i>Ricinus Communis</i>      | RCA     | 500    | Gal    |
| <i>Iberis amara</i>          | IAA     | 500    | GalNAc |
| <i>Mangifera indica</i>      | MIA     | 500    | GalNAc |
| <i>Salvia horminum</i>       | SHA     | 500    | GalNAc |
| <i>Phytolacca americana</i>  | PWM     | 500    | Lac    |
| <i>Agaricus bisporus</i>     | ABA     | 500    | Gal    |
| <i>Aegopodium podagraria</i> | APP     | 500    | GalNAc |
| Bacteria                     | GafD    | 500    | GlcNAc |
| Bacteria                     | PA-IL   | 500    | Gal    |
| Bacteria                     | RS-IIL  | 500    | Man    |
| Bacteria                     | PA-IIL  | 500    | Fuc    |
| antibody                     | 7-LE Ab | 500    | Lac    |
| antibody                     | 2-25 Ab | 500    | Lac    |
| antibody                     | STn 219 | 0.0025 | Lac    |

**Table S3.** Primers, microRNA mimics and inhibitors and constructs used in this study. Construct sequences were confirmed by standard sequencing (Genewiz). <sup>‡</sup> *FUCA2* 3'-UTR sequence is shown below.

|                      | Gene/construct | Direction or Catalog # | Primer sequence                 |
|----------------------|----------------|------------------------|---------------------------------|
| <b>mRNA qPCR</b>     | GAPDH          | FwrD                   | 5'-GAAGGTGAAGGTCGGAGTC-3'       |
|                      |                | Rev                    | 5'-GAAGATGGTGATGGGATTTC-3'      |
|                      | MAN1A2         | FwrD                   | 5'-CCTAGATGGGCAAAGATGGATT-3'    |
|                      |                | Rev                    | 5'-TGTGTTAAAGGCAGGAAGGAGTT-3'   |
|                      | MAN1A1         | FwrD                   | 5'-TACGCTTTGTTGGTGGACTACTCT-3'  |
|                      |                | Rev                    | 5'-GTTCTTCCAATACCATTTTTTCAT-3'  |
|                      | MAN1C1         | FwrD                   | 5'-CAGCAGCATCTTGGCGGAGTTTG-3'   |
|                      |                | Rev                    | 5'-CTGGGCTGAGGAAGTTGGGGTAGA-3'  |
|                      | FUCA2          | FwrD                   | 5'-GAGGTTCTGTGGTCGGATGG-3'      |
|                      |                | Rev                    | 5'-GCCACCATGCTTACAGATGC-3'      |
| <b>microRNA qPCR</b> | miR-30c        | FwrD                   | 5'-GTGTAAACATCCTACACTCTC-3'     |
|                      | miR-181a       | FwrD                   | 5'-AACATTCAACGCTGTTCGGTGA-3'    |
|                      | miR-181b       | FwrD                   | 5'-AACATTCATTGCTGTTCGGTGG-3'    |
|                      | miR-361        | FwrD                   | 5'-GGGGTTATCAGAATCTCCA-3'       |
|                      | miR-16         | FwrD                   | 5'-GCAGCAGCACGTAAATATTGGCGTA-3' |

|                                 |                                               |                  |                                         |
|---------------------------------|-----------------------------------------------|------------------|-----------------------------------------|
| <b>Luciferase Constructs</b>    | pLightSwitch-MAN1A2 3'UTR                     |                  | Purchased from SwitchGear Genomics      |
|                                 | pLightSwitch-MAN1A2 3'UTR 30c Mutant          | Fwrd             | 5'-ACCTGTGTTTCGCTCATATGGACCACT-3'       |
|                                 |                                               | Rev              | 5'-GAGAATGGTCCTTCTGGAAGCTT-3'           |
|                                 | pLightSwitch-MAN1A2 3'UTR 361-5p Mutant       | Fwrd             | 5'-CAAACATGCTATAACATGTGTAGGA-3'         |
|                                 |                                               | Rev              | 5'-GTCAGGTATAAAATGGAATAATTTCAAAG-3'     |
|                                 | pLightSwitch-FUCA2 3'UTR <sup>‡</sup>         | Fwrd             | 5'-AACTCGAGGGCTCTAGCCCTGACTAA-3'        |
|                                 |                                               | Rev              | 5'-AAGCTAGCTTCCAGTCCTGTAAGCTC-3'        |
|                                 | pLightSwitch-FUCA2 3'UTR 200b/200c/429 Mutant | Fwrd             | 5'-CATTGCTAGTAAAGTCTTTTTTGTGCC-3'       |
|                                 |                                               | Rev              | 5'-CATTTCCCAGAAAATATCCCCATATT-3'        |
|                                 | pLightSwitch-ST6GALNAC3-3'UTR                 |                  | Purchased from SwitchGear Genomics      |
|                                 | pLightSwitch-ST6GALNAC3 3'UTR -200b-5p Mutant | Fwrd             | 5'-GCTACTTAACAT GTAAGAT ACCAACTTCAAC-3' |
|                                 |                                               | Rev              | 5'-ATTTTTGGTTGAGTGCTAAATATTTTCAGAAG-3'  |
|                                 |                                               |                  | <b>mature microRNA sequence</b>         |
| <b>miRIDIAN microRNA Mimics</b> | Negative Control #1 (Scramble)                | CN-001000-01-05  |                                         |
|                                 | Positive Control (GAPDH)                      | CP-001000-02-05  |                                         |
|                                 | hsa-miR-30c                                   | C-300542-05-0005 | UGUAAACAUCCUACACUCUCAGC                 |
|                                 | hsa-miR-181a-5p                               | C-300552-05-0005 | AACAUUCAACGCUGUCGGUGAGU                 |

|                                                         |                                  |                   |                          |
|---------------------------------------------------------|----------------------------------|-------------------|--------------------------|
|                                                         | hsa-miR-181b-5p                  | C-300554-07-0005  | AACAUUCAUUGCUGUCGGUGGGU  |
|                                                         | hsa-miR-361-5p                   | C-300663-05-0005  | UUAUCAGAAUCUCCAGGGGUAC   |
|                                                         | hsa-miR-200b-3p                  | C-300582-07-0005  | UAAUACUGCCUGGUAUAUGAUGA  |
|                                                         | hsa-miR-200c-3p                  | C-300646-05-0005  | UAAUACUGCCGGGUAUAUGAUGGA |
|                                                         | hsa-miR-429                      | C-300722-05-0005  | UAAUACUGUCUGGUAAAACCGU   |
|                                                         | hsa-miR-200b-5p                  | C-301144-01-0005  | CAUCUUACUGGGCAGCAUUGGA   |
| <b>miRIDIAN<br/>microRNA<br/>Hairpin<br/>Inhibitors</b> | Negative Control#1<br>(Scramble) | IN-001005-01-05   |                          |
|                                                         | Positive Control<br>(GAPDH)      | IP-004000-01-05   |                          |
|                                                         | hsa-anti-miR-30c                 | IH-300542-07-0005 | UGUAAACAUCUACACUCUCAGC   |
|                                                         | hsa-anti-miR-181a-5p             | IH-300552-07-0005 | AACAUUCAACGCUGUCGGUGAGU  |
|                                                         | hsa-anti-miR-181b-5p             | IH-300554-08-0005 | AACAUUCAUUGCUGUCGGUGGGU  |
|                                                         | hsa-anti-miR-361-5p              | IH-300663-07-0005 | UUAUCAGAAUCUCCAGGGGUAC   |

### Supplementary Methods and Sequences:

#### RT-qPCR conditions for mRNA amplification:

- Step one-95 for 10 min
- Step two and three-95 for 15 sec; 60 for 1 min \*40 cycles
- Step four- 95 for 15 sec
- Step five- 60 for 15 sec to 95 for 15 sec (RAMP 20 min)
- Step six- 95 for 15 sec
- Step seven- 4 for 1 min

#### Sequence of FUCA2 3'-UTR cloned from HT-29:

5'-  
GGCTCTAGCCCTGACTAATGTGATCTAAAGTGCAGCAGAGTGGCTGATGCTGCAAGTTATGTCTAAGGCTAGGAACT  
ATCAGGTGTCTATAATTGTAGCACATGGAGAAAAGCAAATGTAAAAGTGGATAAGAAAATTATTTTGGCAGTTCAGCC  
CTTTCCCTTTTCCCCTAAATTTTCTTAAATTACCCATGTAACCATTTTAACTCTCCAGTGCACCTTGCCATTA  
AAGTCTCTTCACATTGATTTGTTTCCATGTGTGACTCAGAGGTGAGAATTTTTCACATTATAGTAGCAAGGAATTG  
GTGGTATTATGGACCGAACTGAAAATTTTATGTTGAAGCCATATCCCCATGATTATATAGTTATGCATCACTTAAT

ATGGGGATATTTTCTGGGAAATGCATTGCTAGTCAATTTTTTTTTTGTGCCAACATCATAGAGTGTATTTACAAAATC  
CTAGATGGCATAGCCTACTACACACCTAATGTGTATGGTATAGACTGTTGCTCCTAGGCTACAGACATATACAGCAT  
GTTACTGAATACTGTAGGCAATAGTAACAGTGGTATTTGTATATCGAAACATATGGAAACATAGAGAAGGTACAGTA  
AAAATACTGTAAAATAAATGGTGCACCTGTATAGGGCACTTACCACGAATGGAGCTTACAGGACTGGAA-3'
